# Supplementary material
Source: publisher site journal article supplement (https://www.dovepress.com/article/382037)
Supplement: Supplementary file 1 [file get_supplementary_file.php]

We searched five electronic databases (Web of Science, PubMed, Embase, Cochrane Library, Clinical Trials.gov, PEDro) from inception until **May 1, 2022.**

**PubMed**

**Keywords:**

**#1 :** ((((((((((Pulmonary Disease, Chronic Obstructive[MeSH Terms]) OR (Chronic Obstructive Lung Disease[Title/Abstract])) OR (Chronic Obstructive Pulmonary Diseases[Title/Abstract])) OR (COAD[Title/Abstract])) OR (COPD[Title/Abstract])) OR (Chronic Obstructive Airway Disease[Title/Abstract])) OR (Chronic Obstructive Pulmonary Disease[Title/Abstract])) OR (Airflow Obstruction, Chronic[Title/Abstract])) OR (Airflow Obstructions, Chronic[Title/Abstract])) OR (Chronic Airflow Obstructions[Title/Abstract])) OR (Chronic Airflow Obstruction[Title/Abstract])

**#2:** ((((((((((((Singing[MeSH Terms]) OR (Whistling[Title/Abstract])) OR (Whistlings[Title/Abstract])) OR (Vocalization, Rhythmic[Title/Abstract])) OR (Rhythmic Vocalization[Title/Abstract])) OR (Rhythmic Vocalizations[Title/Abstract])) OR (Vocalizations, Rhythmic[Title/Abstract])) OR (Chant[Title/Abstract])) OR (Chants[Title/Abstract])) OR (Singer[Title/Abstract])) OR (Singers[Title/Abstract])) OR (singing therapy[Title/Abstract])) OR (singing*[Title/Abstract])

**#3 :** ((Music Therapy[MeSH Terms]) OR (Therapy, Music[Title/Abstract])) OR (music training[Title/Abstract])

**#4 :** #2or#3 (((((((((((((Singing[MeSH Terms]) OR (Whistling[Title/Abstract])) OR (Whistlings[Title/Abstract])) OR (Vocalization, Rhythmic[Title/Abstract])) OR (Rhythmic Vocalization[Title/Abstract])) OR (Rhythmic Vocalizations[Title/Abstract])) OR (Vocalizations, Rhythmic[Title/Abstract])) OR (Chant[Title/Abstract])) OR (Chants[Title/Abstract])) OR (Singer[Title/Abstract])) OR (Singers[Title/Abstract])) OR (singing therapy[Title/Abstract])) OR (singing*[Title/Abstract])) OR (((Music Therapy[MeSH Terms]) OR (Therapy, Music[Title/Abstract])) OR (music training[Title/Abstract]))

**#5 :** #1and#4 (((((((((((Pulmonary Disease, Chronic Obstructive[MeSH Terms]) OR (Chronic Obstructive Lung Disease[Title/Abstract])) OR (Chronic Obstructive Pulmonary Diseases[Title/Abstract])) OR (COAD[Title/Abstract])) OR (COPD[Title/Abstract])) OR (Chronic Obstructive Airway Disease[Title/Abstract])) OR (Chronic Obstructive Pulmonary Disease[Title/Abstract])) OR (Airflow Obstruction, Chronic[Title/Abstract])) OR (Airflow Obstructions, Chronic[Title/Abstract])) OR (Chronic Airflow Obstructions[Title/Abstract])) OR (Chronic Airflow Obstruction[Title/Abstract])) AND ((((((((((((((Singing[MeSH Terms]) OR (Whistling[Title/Abstract])) OR (Whistlings[Title/Abstract])) OR (Vocalization, Rhythmic[Title/Abstract])) OR (Rhythmic Vocalization[Title/Abstract])) OR (Rhythmic Vocalizations[Title/Abstract])) OR (Vocalizations, Rhythmic[Title/Abstract])) OR (Chant[Title/Abstract])) OR (Chants[Title/Abstract])) OR (Singer[Title/Abstract])) OR (Singers[Title/Abstract])) OR (singing therapy[Title/Abstract])) OR (singing*[Title/Abstract])) OR (((Music Therapy[MeSH Terms]) OR (Therapy, Music[Title/Abstract])) OR (music training[Title/Abstract])))

**We have found 61 articles used the keywords above.**

**Embase**

**Keywords:**

**#1 :** 'pulmonary disease, chronic obstructive':ab,ti OR 'chronic obstructive lung disease':ab,ti OR 'chronic obstructive pulmonary diseases':ab,ti OR coad:ab,ti OR copd:ab,ti OR 'chronic obstructive airway disease':ab,ti OR 'chronic obstructive pulmonary disease':ab,ti OR 'airflow obstruction, chronic':ab,ti OR 'airflow obstructions, chronic':ab,ti OR 'chronic airflow obstructions':ab,ti OR 'chronic airflow obstruction':ab,ti

**#2 :** singing:ab,ti OR whistling:ab,ti OR whistlings:ab,ti OR 'vocalization, rhythmic':ab,ti OR 'rhythmic vocalization':ab,ti OR 'rhythmic vocalizations':ab,ti OR 'vocalizations, rhythmic':ab,ti OR chant:ab,ti OR chants:ab,ti OR singer:ab,ti OR singers:ab,ti OR 'singing therapy':ab,ti OR singing*:ab,ti

**#3 :** 'music therapy':ab,ti OR 'therapy, music':ab,ti OR 'music training':ab,ti

**#4 :** #2or#3

**#5 :** #4and#1

**We have found 73 articles used the keywords above.**

**Web of sciense**

**Keywords:**

***#1 :*** ((((((((((TS=(Pulmonary Disease, Chronic Obstructive)) OR AB=(Chronic Obstructive Lung Disease)) OR AB=(Chronic Obstructive Pulmonary Diseases )) OR AB=(COAD)) OR AB=(COPD)) OR AB=(Chronic Obstructive Airway Disease)) OR AB=(Chronic Obstructive Pulmonary Disease)) OR AB=(Airflow Obstruction, Chronic)) OR AB=(Airflow Obstructions, Chronic)) OR AB=(Chronic Airflow Obstructions)) OR AB=(Chronic Airflow Obstruction)

***#2 :*** ((((((((((((TS=(Singing)) OR AB=(Whistling)) OR AB=(Whistlings)) OR AB=(Vocalization, Rhythmic)) OR AB=(Rhythmic Vocalization)) OR AB=(Rhythmic Vocalizations)) OR AB=(Vocalizations, Rhythmic)) OR AB=(Chant)) OR AB=(Chants)) OR AB=(Singer)) OR AB=(Singers)) OR AB=(singing therapy)) OR AB=(singing*)

***#3 :*** ((TS=(Music Therapy)) OR AB=(Therapy, Music)) OR AB=(music training)

***#4 :*** (#2) OR #3

***#5 :*** (#1) AND #4

**We have found 64 articles used the keywords above.**

**Cochrane Library**

**Keywords:**

***#1:*** MeSH descriptor: [Pulmonary Disease, Chronic Obstructive] explode all trees

***#2:*** MeSH descriptor: [Music Therapy] explode all trees

***#3:*** MeSH descriptor: [Singing] explode all trees

***#4***: #2 OR #3

***#5***: #1 AND #4

**We have found 11 articles used the keywords above.**

**Clinical Trials.gov**

**Keywords:**

singing OR Whistling OR Rhythmic OR Vocalizations OR Rhythmic Vocalizations OR Chant OR Singer OR Music | Available, Completed, Terminated Studies | COPD OR COAD OR Chronic Obstructive Airway Disease OR Airflow Obstruction, Chronic OR Chronic Airflow Obstruction

**We have found 17 articles used the keywords above.**

**PEDro**

**Keywords:**

Abstract & Title: COPD+ Pulmonary Disease, Chronic Obstructive+ Chronic Obstructive Lung Disease+ Chronic Obstructive Pulmonary Diseases+ COAD

Body Part: Chest

Topic: chronic respiratory disease

**We have found 11 articles used the keywords above.**
